# Supplementary material for: Piezoelectrically active hydrothermal KNbO3 thin films
Source: Royal Society of Chemistry journal article supplement (doi:10.1039/c1ce05908d), 2011-10-24
Supplement: c1ce05908d.pdf [file c1ce05908d.pdf]

## Piezoelectrically active hydrothermal $\text{KNbO}_3$ thin films†

*Albertus D. Handoko<sup>a,‡</sup>, Gregory K. L. Goh<sup>\*a</sup>, Rong Xin Chew<sup>a</sup>*

Electronic supplementary information (ESI): Off-axis gonio scan of as-grown KN film.

Prior to conducting off-axis phi ( $\phi$ ) scan to determine the orientation of KN film with respect to STO substrate, it is ensured that the KN (002) peak is well separated from STO (110) peak in the off-axis  $\theta$ - $2\theta$  scan (Supporting figure 1). The purpose of the additional off-axis  $\theta$ - $2\theta$  scan is to ensure that the phi scans signals of KN films do not originate from the STO substrate.

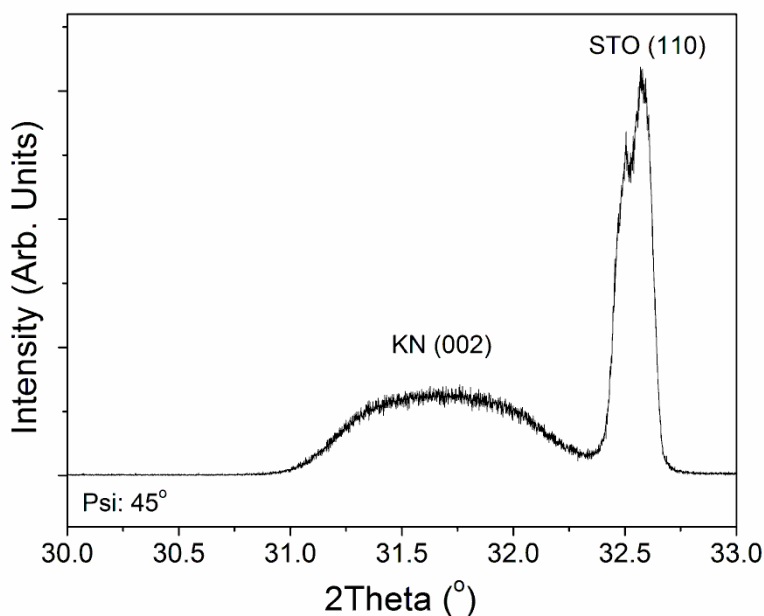

**Supporting figure 1: Off-axis gonio scan showing distinguishable KN (002) and STO (110) peaks.**
